# Supplementary material
Source: PubMed Central journal article supplement (PMC4426233)

32 **Legends : Supplemental figure 1**

33 **NADPH oxidase activity in human EBV-B cells. A.** Monitoring of intracellular activity by  
34 luminol untreated or treated with PMA (400 ng/ml) using 350,000 EBV-B cells from healthy  
35 controls (n=7), CGD (n=3), cIFN- $\gamma$ R1 (n=5) and cIFN- $\gamma$ R2 (n=3). RLU indicates relative light  
36 units. The kinetic data are mean of duplicates for two independent experiments. **B.**  
37 Monitoring of extracellular activity by isoluminol in response to PMA (400 ng/ml). We used  
38 350,000 EBV-B cells from healthy controls (n=7), CGD (n=3), cIFN- $\gamma$ R1 (n=5) and cIFN-  
39  $\gamma$ R2 (n=3 ). RLU indicates relative light units. The kinetic data are mean of duplicates for two  
40 independent experiments.

41

## Supplemental figure 1

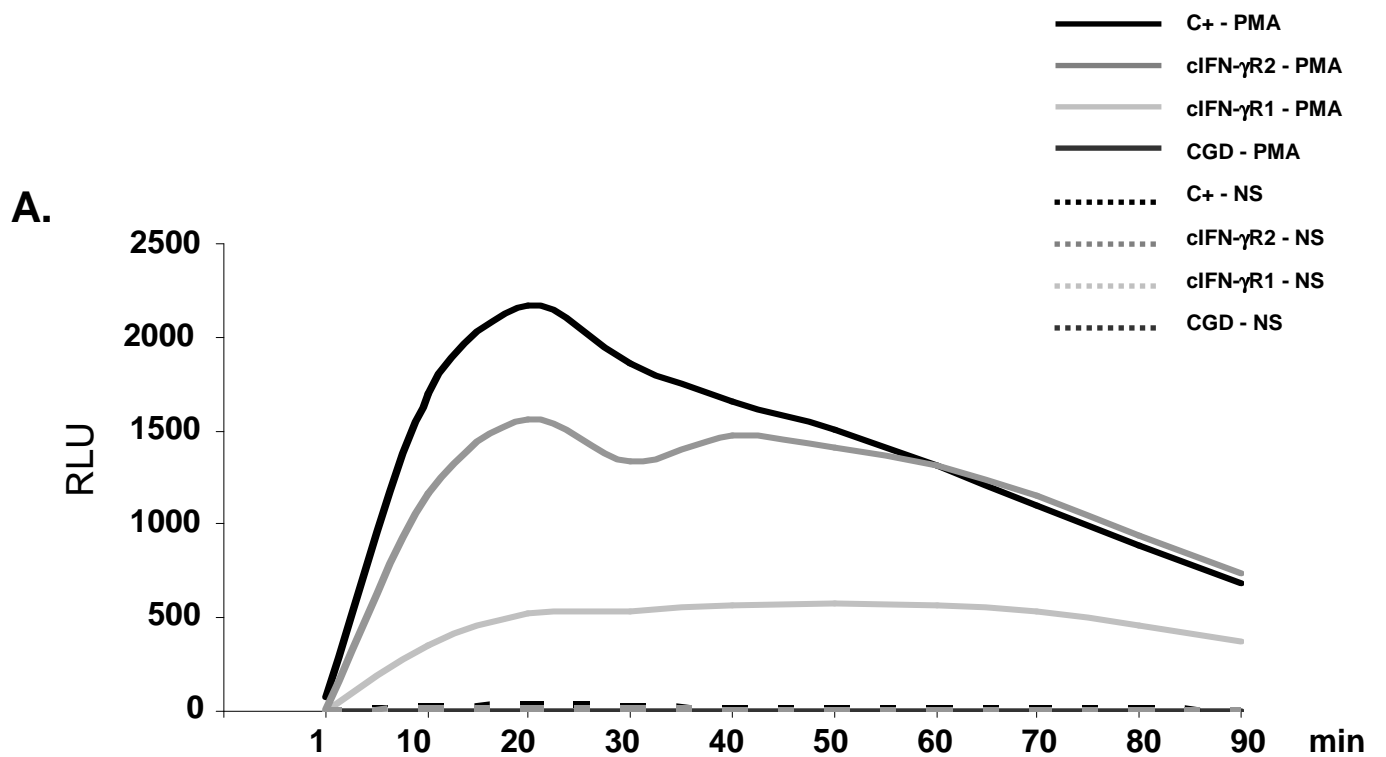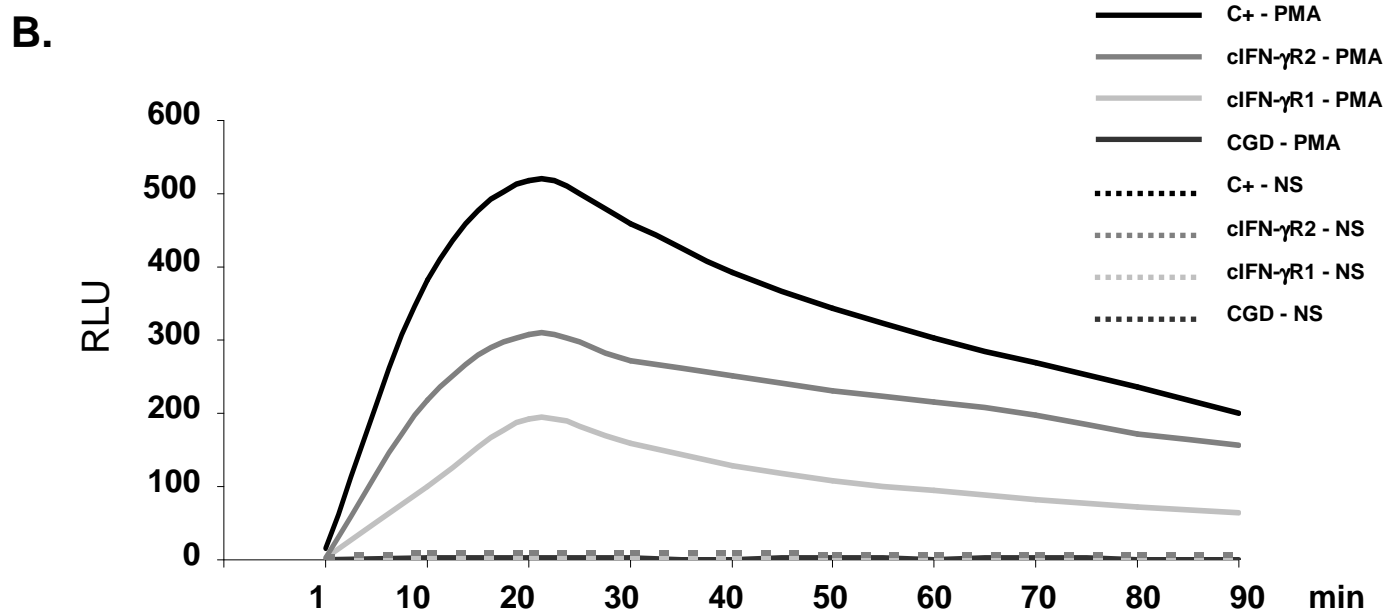

Supplement: NIHMS651829-supplement-01.pdf [file NIHMS651829-supplement-01.pdf]
